# Supplementary material for: Anti-CD44 antibodies inhibit both mTORC1 and mTORC2: a new rationale supporting CD44-induced AML differentiation therapy
Source: PubMed Central journal article supplement (PMC5155032; doi:10.1038/leu.2016.221), 2016-09-13
Supplement: leu2016221x2.pdf [file leu2016221x2.pdf]

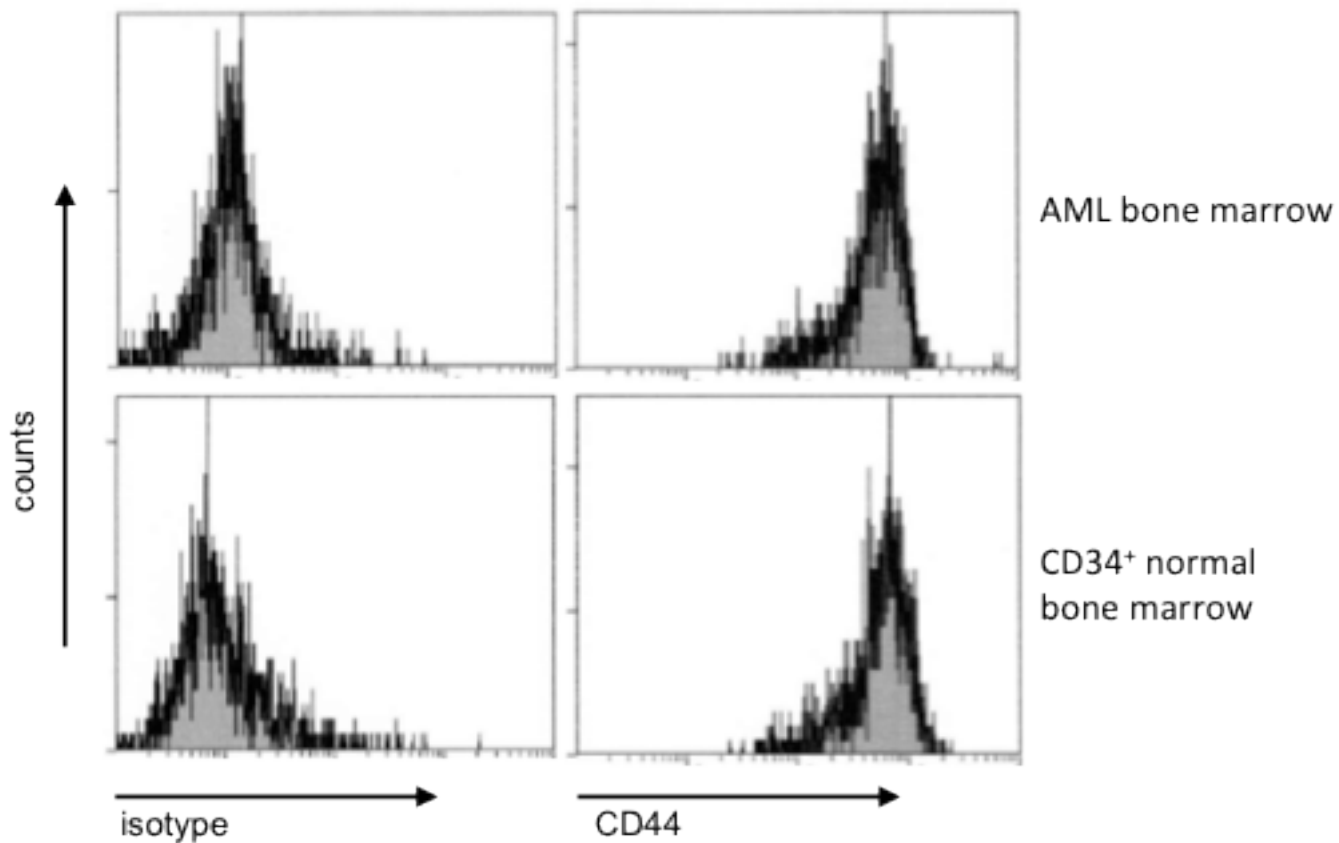

Supplementary Figure 1
